# Supplementary material for: Abating dopant competition between dual high-valence ions in single-phased barium ferrite towards ultra-broad microwave absorption
Source: Royal Society of Chemistry journal article supplement (doi:10.1039/d3tc03246a), 2023-01-01
Supplement: d3tc03246a1.pdf [file d3tc03246a1.pdf]

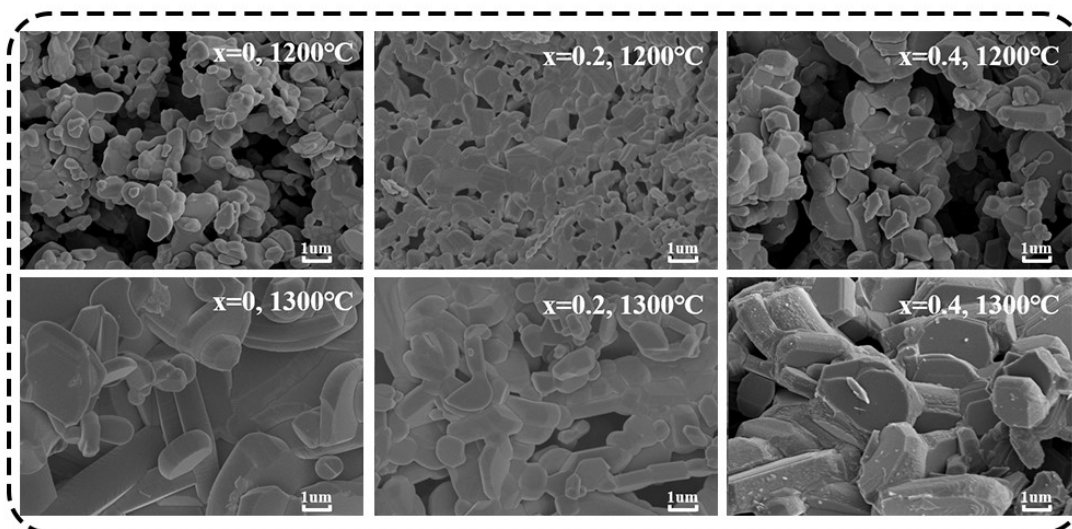

**Figure S1** The SEM images sintered at 1200 ~ 1300°C for 3h of the BFZTO samples with x=0, 0.2 0.4

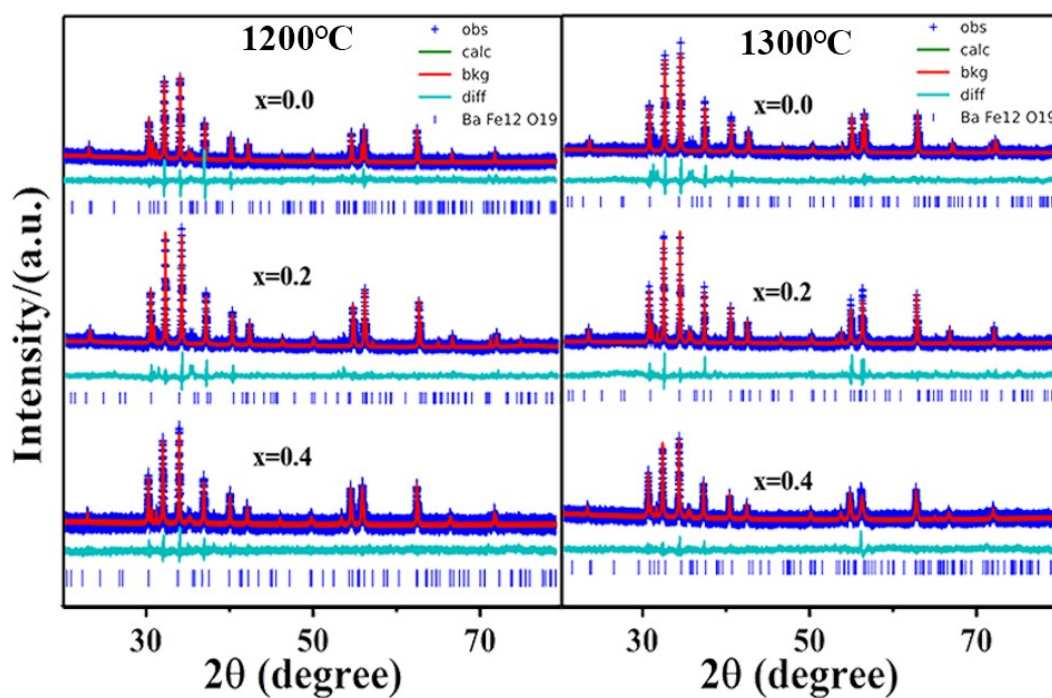

**Figure S2** The Rietveld refinement of XRD patterns sintered at 1200~1300°C for 3 h of the BFZTO samples with x=0, 0.2, 0.4

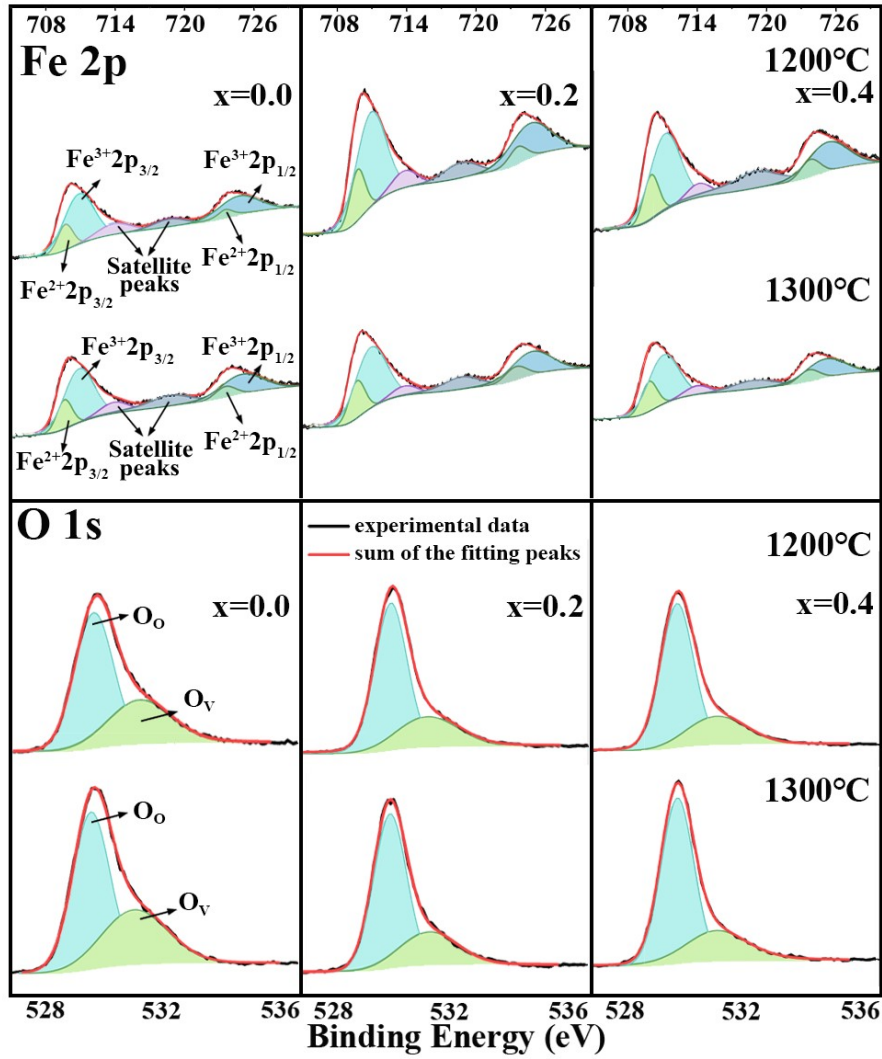

**Figure S3** The XPS spectra of Fe 2p and O 1s of the BZTFO samples with  $x=0, 0.2, 0.4$  sintered at 1200~1300°C for 3 h

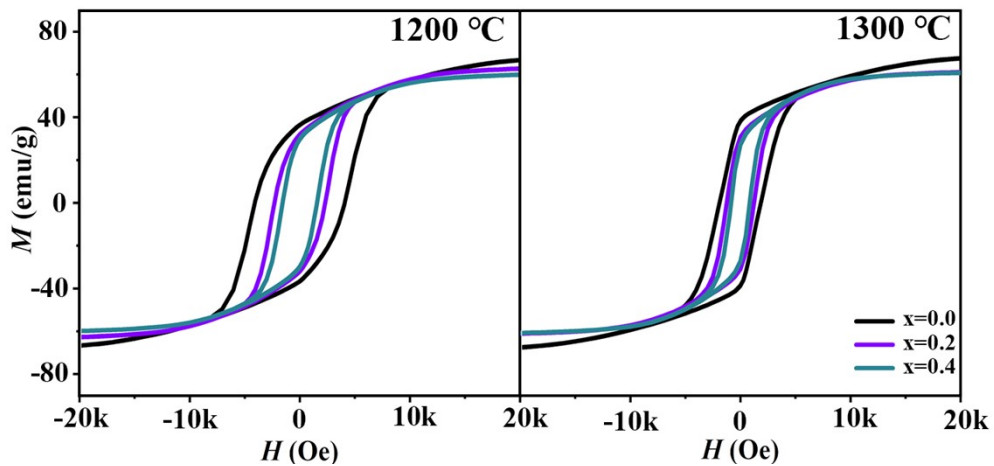

**Figure S4** The hysteresis loops of the BZTFO samples with  $x=0, 0.2, 0.4$  sintered at 1200~1300°C for 3 h

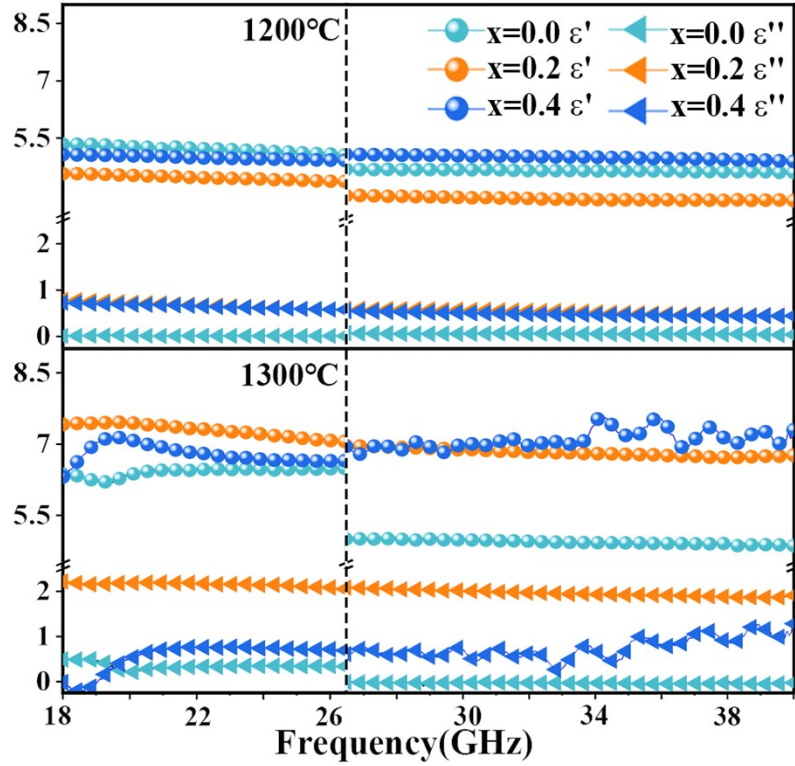

**Figure S5** Frequency-dependent curves of permittivity in 18~40 GHz of the BFZTO samples sintered at 1200~1300°C for 3 h

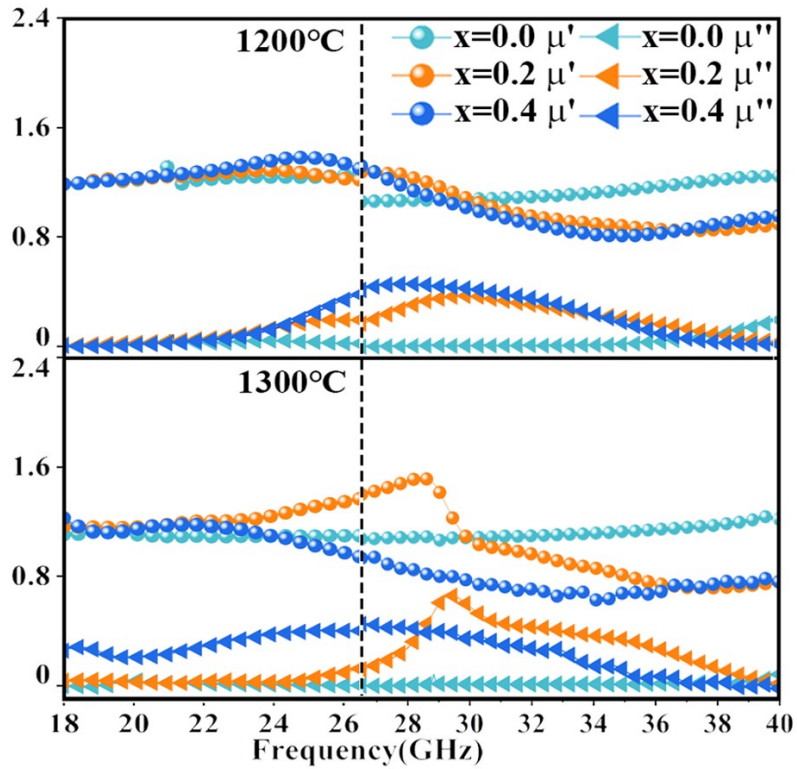

**Figure S6** Frequency-dependent curves of permeability in 18~40 GHz of the BFZTO samples sintered at 1200~1300°C for 3 h

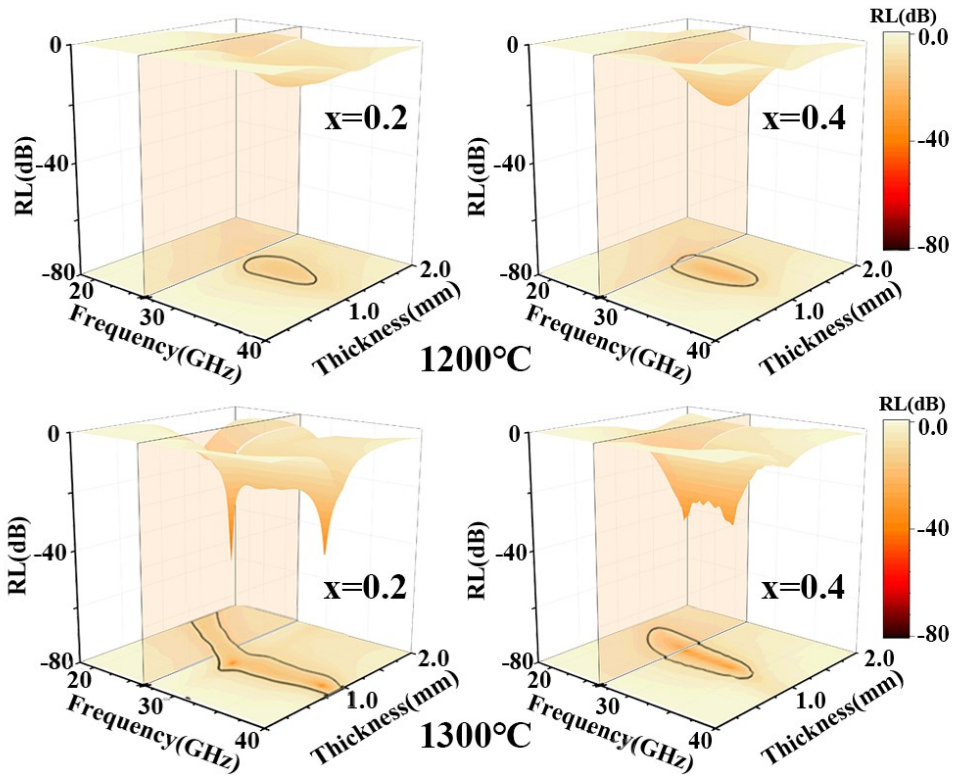

**Figure S7** The reflection loss versus frequency and thickness of the BZTO with  $x=0.2$  and  $0.4$  sintered at 1200~1300°C for 3 h
